# Rapid sex-specific evolution of age at maturity is shaped by genetic architecture in Atlantic salmon

**Authors:** Czorlich, Y.<sup>1,2</sup>, Aykanat T.<sup>3</sup>, Erkinaro, J.<sup>2</sup>, Orell P.<sup>2</sup> & Primmer, CR.<sup>3\*</sup>

## **Affiliations:**

<sup>1</sup> University of Turku, Department of Biology, Itäinen Pitkätatu 4, FI-20520 Turku, Finland

<sup>2</sup> Natural Resources Institute Finland (Luke), POB 413, FI-90014 Oulu, Finland

<sup>3</sup> University of Helsinki, Organismal & Evolutionary Biology Research Programme, POB 56, FI-00014 Helsinki, Finland

\*Corresponding author: craig.primmer@helsinki.fi

## **Abstract**

Understanding the mechanisms by which populations adapt to their environments is a fundamental aim in biology. However, it remains challenging to identify the genetic basis of traits, provide evidence of genetic changes and quantify the phenotypic response. Age at maturity in Atlantic salmon represents an ideal trait to study contemporary adaptive evolution as it has been associated with a single locus in the *vgll3* region, and has also strongly changed in recent decades. Here, we provide an empirical example of contemporary adaptive evolution of a large effect locus driving contrasting sex-specific evolutionary responses at the phenotypic level. We identified an 18% decrease in the *vgll3* allele associated with late maturity (*L*) in a large and diverse salmon population over 36 years, induced by sex-specific selection during the sea migration. Those genetic changes resulted in a significant evolutionary response in males only, due to sex-specific dominance patterns and *vgll3* allelic effects. Our study highlights the importance of knowledge of genetic architecture to better understand fitness trait evolution and phenotypic diversity. It also emphasizes the potential role of adaptive evolution in the trend toward earlier maturation observed in numerous Atlantic salmon populations worldwide.

## **Introduction**

Understanding the mechanisms by which populations adapt to their environments is a fundamental aim in biology<sup>1,2</sup>. Such mechanisms may represent the only way for certain populations to persist in the face of strong human pressures and accelerated rates of climate change altering their environment. Temporal monitoring has documented recent and rapid phenotypic changes in wild populations in many species<sup>e.g. 3,4</sup>. However, whether or not such phenotypic changes are adaptive often remains unclear<sup>5,6</sup>. Obtaining evidence of adaptive evolution requires knowledge of the genetic basis of traits and subsequent demonstration that natural selection induces changes in this genetic component<sup>6</sup>. Although the ideal strategy for demonstrating adaptive evolution is to study the genes directly controlling the traits under

selection, such examples are extremely scarce <sup>6,7</sup>. Despite the increased availability of genomic data, the identification of large-effect loci controlling phenotypes of ecological significance and understanding how contemporary selection affects the allele frequency of such genes remains indeed challenging <sup>8</sup>. In cases where the genetic architecture of a trait is well characterized e.g. when a large-effect locus has been identified, retrospective genetic analyses of archived material for the gene(s) controlling the trait in question can be performed and provide detailed information about its evolutionary dynamics <sup>e.g. 9</sup>.

Age at maturity in Atlantic salmon, defined here as the number of years spent at sea prior to maturation, has recently been shown to be controlled by a single large-effect locus with sex-specific effects, located within a narrow (<100kb) region around the *vgll3* gene <sup>10</sup>. The same locus has also recently been linked with gender-biased auto-immune diseases in humans <sup>11</sup>. In Atlantic salmon, age at maturity reflects a classic evolutionary trade-off, as larger, later-maturing individuals typically have higher reproductive success, but run a greater risk of mortality before first reproduction. Sex-specific selection optima may exist for this trait <sup>10</sup>. Males generally mature earlier and at smaller size, whereas females mature later and have a stronger correlation between body size and reproductive success compared with males <sup>12</sup>. It was suggested that the sex-dependent dominance observed at *vgll3* potentially resolves this sexual conflict <sup>10,13</sup>. Furthermore, the age structure of many populations has changed worldwide in recent decades, generally towards an increasing proportion of smaller, earlier maturing individuals <sup>e.g. 14,15 but see 16</sup>. However, the reasons for this, and whether it is an adaptive change, remain unknown <sup>17</sup>. Therefore, age at maturity in Atlantic salmon provides a rare opportunity to investigate the contemporary change of a phenotypic trait directly at the genetic level.

We studied two closely related Atlantic salmon populations from northern Europe with contrasting maturation age structure. Despite a low level of genetic divergence between them ( $F_{ST} = 0.012$ )<sup>18</sup>, the Tenojoki population displays a high level of life-history diversity including a high proportion of large, later maturing individuals in both sexes, whereas the Inarijoki population consists primarily of individuals of younger maturation ages, and with less life-history variation, particularly in males <sup>15</sup>. Here, we utilized a 40 year time series to detect potential signs of adaptive evolution in age at maturity by contrasting allele frequency changes at the maturation gene *vgll3* with life-history phenotypes in 2500 samples from the two populations. We also used the genetic data to investigate the occurrence of sex- and population-specific genetic architecture and selection, potentially explaining the observed diversity variation in age at maturity.

## Results:

### Temporal changes in age at maturity

We first quantified temporal phenotypic changes in both populations. There was a non-linear decrease in the age at maturity of Tenojoki individuals, with the mean maturation age of males and females declining by >40% (from 2.2 to 1.3 years;  $edf = 3.87$ ,  $F = 5.11$ ,  $P < 0.001$ ) and 8.1% (from 3.0 to 2.7 years;  $edf = 1.27$ ,  $F = 0.57$ ,  $P = 0.02$ ), respectively, during the 36

77 year time period (Figure 1A). In Tenojoki males, the decrease occurred primarily between  
 78 1971 and 1987 before stabilization, while in females, age at maturity gradually decreased  
 79 over the 36 year study period, explained best by a slightly nonlinear slope (Figure 1A). In  
 80 comparison, Inarijoki males were virtually devoid of variation in age at maturity, with almost  
 81 all males having spent one year at sea before maturing ( $edf = 0.00$ ,  $F=0.00$ ,  $P = 0.731$ ),  
 82 whereas mean age at maturity in females fluctuated cyclically over the 37 years ( $edf = 10.14$ ,  
 83  $F = 6.035$ ,  $P < 0.001$ , Figure 1B), but with no indication of a decrease in average maturation  
 84 age (Figure 1B).

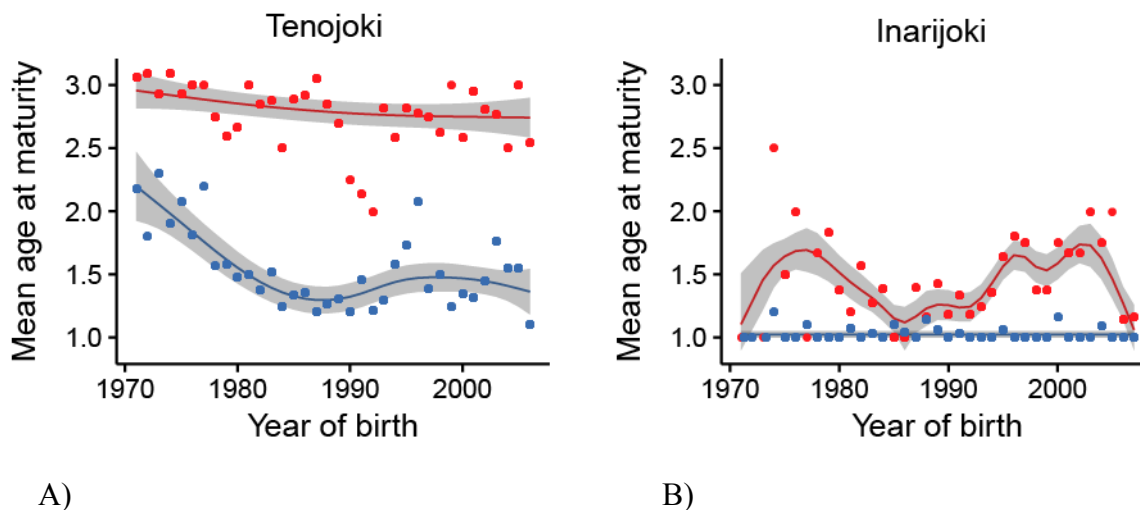

**Figure 1: Change in mean age at maturity in the A) Tenojoki and B) Inarijoki populations.**

Females are in red ( $N$  Tenojoki = 467,  $N$  Inarijoki = 261) and males in blue ( $N$  Tenojoki = 699,  $N$  Inarijoki = 570). Lines represent fitted values from the GAM  $\pm 1.96$  SE, points are observed annual means.

## 85 Genetic architecture of age at maturity

86 We hereafter use genetic architecture to refer to the additive and dominance effects of *vgll3*  
 87 on the age at maturity. The *vgll3* genotypes had a sex-specific effect on the probability to  
 88 observe the different ages at maturity in the Tenojoki population ( $\chi^2_{(6)} = 27.58$ ,  $P < 0.001$ ). A  
 89 sex-specific dominance pattern was observed in this population; heterozygote males had a  
 90 mean age at maturity closer to homozygote *EE* (estimated dominance  $\delta_M = 0.09$ , see Method)  
 91 whereas heterozygote females had a phenotype closer to homozygotes *LL* (estimated  
 92 dominance  $\delta_F = 0.80$ ; Figure 2). In the Inarijoki population, the *vgll3* genotypes were  
 93 significantly associated with the probability to observe the different age at maturity groups  
 94 ( $\chi^2_{(4)} = 56.41$ ,  $P < 0.001$ ) but not in a sex-specific manner ( $\chi^2_{(4)} = 8.27$ ,  $P = 0.08$ ). Differences  
 95 in mean age at maturity between homozygotes varied depending on the sexes and populations  
 96 (i.e. additive or allelic effect: effect of the substitution of one allele for the other). In the  
 97 Tenojoki population, the relative difference in mean age at maturity between alternative *vgll3*  
 98 homozygotes was three times higher in males (+100% for *LL*) than in females (+32% for *LL*).  
 99 This pattern was inverted in Inarijoki, with the difference in mean age at maturity between  
 100 female homozygotes being about six times larger (+74% for *LL*) than in males (+12% for *LL*,

Figure 2). These results imply that selection during the sea migration, defined as the relative difference in survival between genotypes, is likely to vary between sexes and populations. There was no statistically significant change in the effect size of *vgll3* on maturation age over time in either population (Tenojoki:  $\chi^2_{(6)} = 6.07$ ,  $P = 0.42$ ; Inarijoki:  $\chi^2_{(4)} = 4.41$ ,  $P = 0.35$ ).

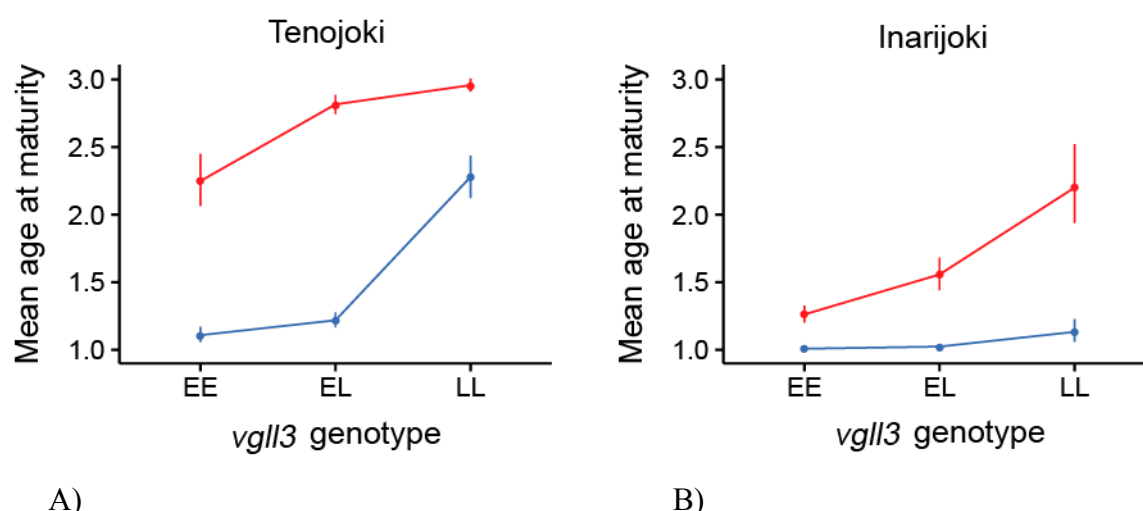

**Figure 2: Mean age at maturity as a function of *vgll3* genotype in the A) Tenojoki and B) Inarijoki populations.**

Females are in red ( $N$  Tenojoki = 522,  $N$  Inarijoki = 286) and males in blue ( $N$  Tenojoki = 804,  $N$  Inarijoki = 612). Means are calculated from multinomial models fitted values, averaged over years. Error bars represents 95% bootstrap confidence intervals based on 1000 replicates. Estimated dominances from mean ages are 0.13 and 0.32 in Inarijoki males and females, respectively.

## Evolution of *vgll3* and signals of selection

The *vgll3* late maturing (*L*) allele frequency decreased significantly, from 0.66 to 0.54 (18%) in 36 years, in the Tenojoki population ( $F_{(1)} = 7.80$ ,  $P = 0.009$ ; log-odd slope = -0.014 (95%  $CI_{95} = [-0.004, -0.024]$ ; Figure 3A). This allele frequency change was the highest of all the 144 genome-wide SNPs assessed (Figure 3A). This observation provides strong support for natural selection acting against the *vgll3* *L* allele in the Tenojoki population as allele frequency changes of similar or greater size would be expected in other putatively neutral loci if such changes were due to genetic drift. In the Inarijoki population, the trend in the *vgll3* *L* allele frequency was also negative (slope = -0.0086,  $CI_{95} = [-0.0232, 0.0060]$  but not significant ( $F_{(1)} = 1.29$ ,  $P = 0.26$ , Figure 3B). About 10% of the 134 genome-wide SNPs assessed had a steeper linear trend in allele frequency than *vgll3* in this sub-population (Figure 3B).

To further quantify the strength of selection driving changes in *vgll3* allele frequency, a Bayesian model was developed to estimate selection coefficients whilst accounting for genetic drift, similar to a Wright-Fisher model (see Methods). The selection coefficient in the Tenojoki population was large and significantly higher than zero, albeit with large credibility intervals ( $-s = 0.33$  (95% credibility interval = [0.01, 0.77]). In Inarijoki, there was no evidence for significant selection ( $s = 0.25$ ,  $CI_{95} = [-0.07, 0.49]$ ).

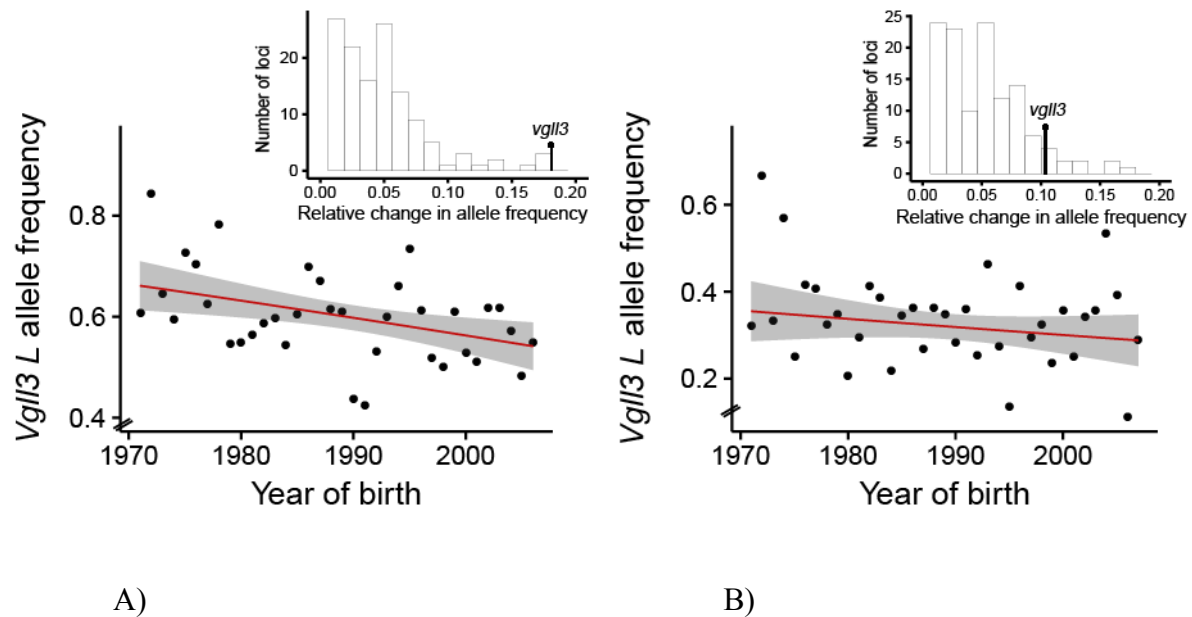

**Figure 3: Temporal changes in *vgll3* *L* allele frequency associated with late maturation in the A) Tenojoki and B) Inarijoki populations.**

The lines represent fitted values from the quasibinomial model with  $\pm 1.96$  SE ( $N$  Tenojoki = 1166,  $N$  Inarijoki = 765). Panels compare the percentages of change in allele frequencies among loci over the studied period.

The *vgll3* *L* allele frequency differed between sexes in a contrasting manner in the two populations. The odds of possessing an *L* allele was 37% higher in females than in males in the Tenojoki population ( $CI_{95} = [0.12, 0.69]$ ,  $F_{(1)} = 8.72$ ,  $P < 0.01$ , Figure 4) but 53% lower in Inarijoki ( $CI_{95} = [0.40, 0.65]$ ,  $F_{(1)} = 36.51$ ,  $P < 0.001$ , Figure 4). This could be the result of either sex- and genotype-specific sex ratios at fertilization or juvenile mortality in freshwater, or alternatively, *vgll3* genotype-specific selection differing between the sexes during sea migration, prior to returning to reproduce. In order to distinguish between these alternatives, we genotyped 143 and 108 juveniles of various ages collected from the same freshwater locations in Tenojoki and Inarijoki (1-3 years old, see Methods), respectively. Juvenile sex ratios were close to parity and the *vgll3* *L* allele frequency was similar in both sexes in both populations ( $\chi^2_{(1)} = 3.27$ ,  $P = 0.07$  in Tenojoki,  $\chi^2_{(1)} = 0.04$ ,  $P = 0.85$  in Inarijoki, Figure 4). This provides support for the notion that selection is acting on the *L* allele in a sex-specific manner during the marine life-history phase, as opposed to during the freshwater juvenile phase. Such sex-specific allele frequency patterns may be reinforced by sex specific dominance (Supplementary Figure 7).

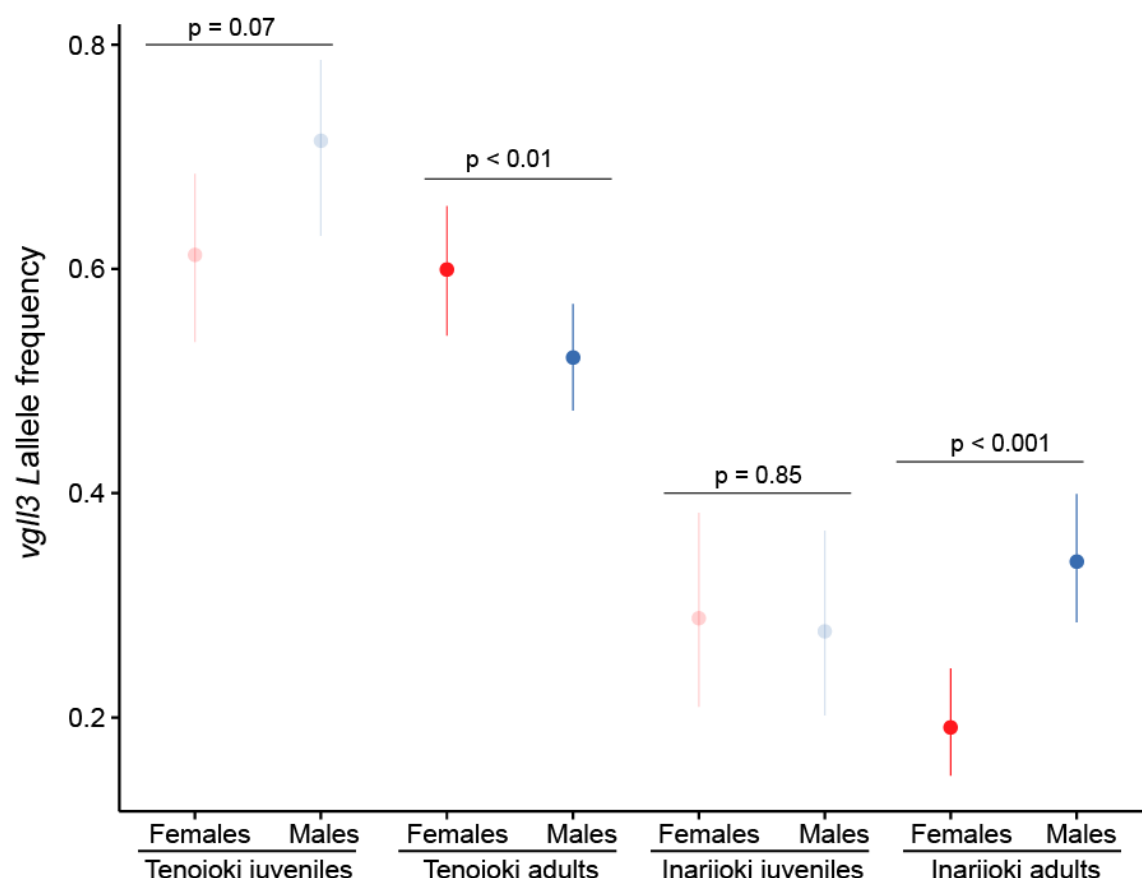

**Figure 4: Model predicted mean *vgll3* L allele frequency as a function of the sex and reproductive status in Tenojoki and Inarijoki.**

Error bars indicates 95% confidence intervals. The years 2006 and 2007 were used as reference years for adults allele frequency in dark red (females) and dark blue (males) in respectively the Tenojoki and inarijoki populations.

# Sex-specific evolutionary response

In Tenojoki, the sex-specific genetic architecture drove contrasting evolutionary responses in the two sexes. Temporal changes in genotypes explained about 50% of the non-linear decrease in male age at maturity (0.46 years,  $edf = 3.95$ ,  $F = 3.51$ ,  $P < 0.001$ ; Supplementary Figure 8) but didn't explain the temporal changes in female age at maturity ( $edf = 0$ ,  $F = 0.00$ ,  $P = 0.54$ ). Both the sex-specific dominance patterns and *vgll3* effect sizes potentially contribute to the contrasting genotype-phenotype link between the sexes, despite similar linear trends in genotype frequencies ( $\chi^2_{(2)} = 2.78$ ,  $P = 0.25$ ). For example in females, the dominance of the late maturation L allele means that a decrease in the frequency of this allele does not necessarily result in a decrease in age at maturity, as a decrease in LL genotype frequency would be partially compensated by the increase in the EL genotype frequency, which results in a similar phenotype distribution due to dominance effect (Figure 2, Supplementary Figure 9). Hence, temporal life-history change would mostly stem from the increase in the proportion of individuals with the EE genotypes, maturing about 0.71 years earlier than LL individuals. In contrast, in males, the recessivity of the *vgll3* L allele ( $\delta_M =$



0.09) would favor a larger decrease in age at maturity when proportion of heterozygotes *EL* is increasing as the age at maturity decline is a result of the combined increase in *EE* and *EL* genotype frequencies, which mature on average 1.12 year earlier than *LL* individuals. Most of the female age at maturity decline could be explained by the spawning year (0.20 year,  $edf = 2.16$ ,  $F = 21.61$ ,  $P < 0.001$ ). The spawning year would induce in parallel up to 0.15 year decrease in male maturation age ( $edf = 2.126$ ,  $F = 12.41$ ,  $P < 0.001$ ).

## Discussion

We provide convincing evidence of rapid adaptive evolution of age at maturity toward small, early-maturing individuals in a large Atlantic salmon population. This indicates that despite having a reproductive advantage due to their large size<sup>12,19</sup>, the late maturation life-history strategy has become increasingly costly and modified the reproductive success vs survival trade-off such that earlier maturation is increasingly advantageous. Adaptive evolution may represent a realistic mechanism behind changes in age at maturity observed worldwide in the last decades in Atlantic salmon<sup>e.g. 14–16,20</sup> and other salmonid fish species<sup>e.g. 21</sup>. What could be the causes of such rapid evolution of a life-history trait? One explanation is that it could be linked to recent rapid changes in the marine environment of the Teno salmon populations. For example, climate change may affect Atlantic salmon growth and/or survival directly<sup>e.g. 22</sup> or indirectly through changes in Arctic food-webs and ecosystem functioning resulting from e.g. species range expansions<sup>20,23,24</sup>. Atlantic salmon occupying the northernmost parts of the globe will be unable to move to a colder climate in response to ocean warming, which would reinforce the importance of adaptation for population persistence. Another possibility is human-induced evolution of age at maturity through fishing targeting Atlantic salmon differentially according to their size<sup>e.g. 25, but see 26</sup> or reducing prey availability<sup>e.g. 27</sup>. It is important to note however, that natural selection didn't entirely explain the observed temporal changes in age at maturity in the Tenojoki population. Irrespective of the *vgll3* genotypes, the probability to mature at younger ages, after one or two years at sea, increased over time (Supplementary Information). This could be due to adaptive phenotypic plasticity<sup>28</sup>, through changes in maturation probability towards the same direction as selection, or to changes in allele frequencies of potential minor effect loci. Further investigation is required to test these hypotheses. Regardless, such changes in population age structure can negatively affect the population growth rate and/or temporal stability induced with the portfolio effect<sup>e.g. 29</sup> and also have negative consequences on genetic diversity levels<sup>e.g. 30</sup> and thus are a concern for future population persistence.

Despite common temporal changes in *vgll3* allele frequency between the sexes, differing genetic architectures, in terms of additive and dominance patterns, resulted in sex-specific selection strengths and evolutionary responses to selection. We observed sex-specific differences in *vgll3* allele frequencies in adult salmon that were not present in pre-marine-migration juveniles from the same populations (Figure 4). Interestingly, the direction of the sex-specific differences was opposite in the two populations studied. The combined effects of sex-dependent dominance and sex-specific selection patterns can explain these contrasting patterns. The relative strength of allelic effects differed dramatically between sexes and these

effects were in opposite directions in the two populations: in Inarijoki, the difference in mean age at maturity between homozygotes is about six times larger in females compared to males whereas in Tenojoki, the relative difference was three times higher in males (Figure 2). Therefore, selection against *LL* genotype individuals acts primarily on females in Inarijoki, but on males in Tenojoki (Figure 4). However, sex-specific dominance also plays a role by introducing differences in allele frequencies between sexes that are dependent on population allele frequency (Supplementary Figure 7). Furthermore, sex-specific genetic architectures induce sex-specific evolutionary responses in Tenojoki, by accelerating the decrease in age at maturity in males and reducing the temporal variation in females. Sex-specific dominance is likely to have evolved to reduce intra-locus sexual conflict<sup>10</sup>. However, whether this genetic architecture is nowadays at its optimum is questionable in light of the quick decrease in *vgll3* *L* allele frequency and age at maturity. Further studies are necessary to determine whether sexually antagonist selection in Tenojoki is persisting in ever changing environments.

Age at maturity evolved rapidly under sex-specific selection in just 40 years, equivalent to 7-8 generations in Atlantic salmon. Despite being genetically similar, the two studied populations had distinctive genetic architectures, sex-specific selection and consequently *vgll3* allele frequencies variation. This study shows that variability in genetic architectures can create complex selection and evolution patterns, with responses to environmental changes or anthropogenic pressures differing according to sex and population. This highlights the importance of determining the genetic basis of fitness traits in order to understand their evolution and to explain the phenotypic diversity observed between populations and species.

## Material and methods

### Study site and sampling

The subarctic Teno River forms the border between Finland and Norway and drains north into the Barents sea (68 - 70°N, 25-27°E). Genetically distinct salmon populations<sup>31</sup> are distributed throughout the 16 386 km<sup>2</sup> catchment area. Annual river catches range from about 20,000 to 60,000 individuals, representing up to 20% of the entire riverine Atlantic salmon harvest in Europe<sup>32</sup>. Atlantic salmon populations from Teno have been monitored since early 1970s with collections of scales and phenotypic information by trained fishers. Scales were stored in envelopes at room temperature and used to determine individual life-history characteristics including the number of years spent in the freshwater environment prior to smoltification (river age), number of years spent in the marine environment prior to maturation (sea age) and possible previous spawning events, following international guidelines (ICES 2011). The Teno river Atlantic salmon have diverse life history strategies<sup>15,34</sup>. They can spend from two to eight years in freshwater before smoltifying, from one to five years at sea before maturing and have up to five breeding attempts. Overall, a total of 120 combinations of river age, sea age at maturity and repeat spawning strategies have been described<sup>15</sup>. Age at maturity has been declining in Teno salmon over the last 40 years, with



proportionally fewer late maturing salmon returning over years. Age at maturity also differs largely among populations displaying genomic signatures of local adaptation<sup>15,35</sup>.

We randomly selected scales from individuals caught by rod between 1972 and 2014 during the later part of the fishing season, from July 20 to August 31. Most of the Teno salmon are expected to have reached their home river by late July<sup>36</sup>. Samples came from two different locations, the middle reaches of the Tenojoki mainstem (hereafter Tenojoki) and a headwater region Inarijoki (Supplementary Figure 1). These populations host weakly differentiated salmon populations with contrasting ages at maturity<sup>31,35</sup>. Individuals from the Tenojoki spend, on average, more time at sea before maturing than individuals from the Inarijoki population<sup>15,30</sup>. Seventy additional females were selected in Inarijoki over the study period, by following the same sampling scheme, to increase the sampling size in analyses with sex-specific estimates. Scale or fin samples were also collected from juvenile salmon from the Tenojoki (N=143, 2-3 years old) and Inarijoki (N=108, 1-3 years old) populations caught by electrofishing in the 2012 and 2016, respectively. They were used as the baseline for population assignment of adults and to determine potential sex-specific *vgll3* allele frequency differences at the juvenile stage.

## Genotyping

DNA extraction from scales, sex determination and genotyping were performed following Aykanat et al. (2016). In total, 2482 individuals were genotyped at 191 SNPs, including the SNP the most highly associated with the age at maturity, *vgll3TOP* (vestigial-like family member 3 gene also called *vgll3*,<sup>10</sup>) and outlier and baseline SNP modules<sup>37</sup>. The outlier module consisted of 53 SNPs highly differentiated between the Inarijoki and Tenojoki populations, thus allowing a more powerful assignment of population of origin, between these two closely related populations<sup>i.e. see 30,37</sup>. The baseline module included 136 putatively neutral markers in low linkage disequilibrium, distributed over the whole genome proportionally to chromosome length, previously filtered to have minor allele frequency >0.05 and heterozygosity >0.2<sup>37</sup>. There were used to estimate the level of differentiation among populations of the Teno River (Weir and Cockerham's  $F_{ST}$ ) and genetic drift. Mean genotyping success was on average 0.80 per locus and individual.

## Population assignment

The 53 outlier loci were used to determine the optimum number of genetic clusters and assign the population of origin of adults using the software STRUCTURE. First, an admixture model with correlated allele frequencies<sup>38</sup> was run on adult and juvenile data for 80,000 MCMC iterations, including a burn-in length of 50,000. The model was replicated six times for each cluster value K, varying from one to four. The optimal number of clusters was thereafter estimated using the  $\Delta K$  method described in Evanno, Regnaut, and Goudet (2005) using STRUCTURE HARVESTER<sup>40</sup>. This allowed us to determine whether juveniles were correctly assigned to their sampling locations and could thus be used as a baseline for adult assignment. Then another admixture model with correlated allele frequencies was replicated six times on adult data using juvenile data as a baseline, with prior migration set to 0. The

*fullsearch* algorithm from the CLUMP software (Jakobsson & Rosenberg 2007) was used to account for across replicate variability in membership coefficients. Finally, the cluster of each adult was assigned by using the optimum K and membership probability superior or equal to 0.8. The differentiation between populations was tested by calculating the likelihood ratio G-statistic <sup>41</sup> and comparing it with the G-statistic distribution obtained by permuting 1,000 times individuals between populations.

The most likely number of clusters determined with the  $\Delta K$  method was two when juveniles and adults data were combined (Supplementary Figure 2). Juveniles were assigned accordingly to their sampling location in more than 96% of cases. Using juvenile data as a baseline, 90% of adults were classified to one of the two clusters with probabilities equal or higher than 0.8. Individuals sampled in Tenojoki were assigned to the Inarijoki population in 25% of the cases whereas only 2% of the individuals caught in Inarijoki were assigned to the Tenojoki population. In total, 1330 and 911 individuals clustered in the Tenojoki and Inarijoki populations, respectively (Supplementary Figure 4). The two populations were significantly genetically differentiated ( $F_{ST} = 0.013$ ,  $G = 201.55$ ,  $P < 0.01$ ) and had contrasted age structures (Supplementary Figure 5).

## Statistical analyses

### Temporal variation in age at maturity and proportion of females

Non-linear temporal variation in age at maturity was estimated separately for each population using generalized additive models, with the Gaussian family as the residual distribution. Year of birth was included as an independent variable inside a cubic regression spline for each sex. The birth year periods were selected according to the generation length spent from 1971 to 2006 in Tenojoki and from 1971 to 2007 in Inarijoki. Sex was also included as an explanatory variable.

The amount of smoothing was determined in each case using the maximum likelihood method. Automatic smoothness selection was performed by adding a shrinkage term. The significance of independent variables was assessed using F-tests and an alpha risk of 0.05. All statistical tests included in this manuscript were two-tailed. The additive models were run with the R package *mgcv* <sup>42,43</sup>.

### Effect size of *vgll3* on age at maturity

To estimate the genetic effect of *vgll3*, age at maturity was also regressed using a multinomial model separately for each population. In Tenojoki, two individuals having matured after five years at sea were considered having matured after four years to avoid the estimate of additional model parameters without data support. The sex, year of capture and *vgll3* genotype can all influence age at maturity and were included in models as a three-way interaction. Multinomial models in this study were performed using the R package *nnet* <sup>44</sup>. Model selection was performed using backward selection with F-tests and by calculating the AICc of all possible models. The effect of year on the probability to mature was calculated with the Effect package <sup>45</sup> which averages the effect size across sexes and genotypes. The mean age at maturity per sex and genotype was calculated from model predicted values. First,

predicted age was obtained for each year, sex and age at maturity combination by multiplying the probabilities of having matured after one, two, three or four years at sea by the corresponding sea age and taking the sum. Second, the age at maturity was calculated for each sex and genotype by averaging over years. This process was replicated 1000 times by randomly sampling with replacement and fitting a new model. A 95% bootstrap confidence interval was then determined by taking values of the 2.5 and 97.5 percentiles. The *vgll3* alleles were called *L* and *E* to indicate their association with late and early maturation, respectively<sup>10</sup>. Dominance for each sex and population was estimated from the mean age at maturity ( $\mu$ ) following  $\delta = \frac{\mu_{EL} - \mu_{EE}}{\mu_{LL} - \mu_{EE}}$ . The *L* allele is recessive if  $\delta = 0$ , additive if  $\delta = 0.5$  and dominant if  $\delta = 1$ .

To determine how much of the observed changes in age at maturity over time could be attributed to changes in genotypes and year of capture, a new dataset with the spawning year held constant at 1975 was created for Tenojoki. The previous multinomial model was used to predict new maturation probabilities from which model predicted age at maturity were calculated for each individual, as above. Temporal changes in age at maturity attributed to genotypes were determined by fitting a generalized additive model using the Gaussian family and including the individual birth year in a cubic regression spline and the sex as independent variable. Changes in age at maturity attributed to the year of capture corresponded to the difference between individual predicted age at maturity calculated from the original dataset and the one with the year fixed. Another Gaussian generalized additive model was also performed on those differences, by including the birth year in a cubic regression spline. Automatic smoothness selection was performed by adding a shrinkage term.

### Change in allele and genotype frequencies

Temporal variation in allele frequencies was determined for each population and locus using generalized linear models (*glm*), with the quasibinomial family to account for overdispersion. Sex-dependent *vgll3* genetic effect on the age at maturity<sup>10</sup> may create sex-specific selection at sea, leading to differences in *vgll3* allele frequency between male and female spawners from the same generation. The sex variable can capture this potential intra-generation variation in allele frequency. Hence, sex and year of birth were included as independent variables in the *glm*. To keep the potential effect of sex-specific selection on the *vgll3* allele frequency temporal change, the model was also run without including sex as a covariate. In order to determine whether sea age related SNPs varied across time more than under the neutral expectation, model predicted temporal changes in allele frequencies were compared among loci with individual genotyping success higher than 0.7 (145 and 135 loci for the Tenojoki and Inarijoki populations, respectively). This threshold was chosen given a trade-off between increasing the quality and minimal amount of data per locus (average genotyping success superior to 0.90 in those subsets) and keeping a large number of loci for the comparison (~25-30% of loci were excluded). The significance of variables was assessed with F-tests.

To determine whether potential differences in *vgll3* allele frequencies between adult males and females are likely to arise during the sea migration, juvenile allele frequencies were

analyzed using a separate *glm* with the binomial family for each population. Sex was introduced as an independent variable. A backward model selection was performed using Likelihood-Ratio Tests (LRT) and an alpha risk of 0.05. Confidence intervals were calculated with the *lsmean* package<sup>46</sup> by taking the years 2006 and 2007 as reference for the Tenjoki and Inarijoki adults, respectively.

To further describe temporal changes in *vgll3* genotypes, a multinomial model was used for each population. The year of birth and the sex were introduced as independent variables in a two way interaction. A backward model selection was performed using LRT and an alpha risk of 0.05.

Allele frequencies may differ between sexes in the presence of selection and sex-specific dominance patterns. The expected sign and magnitude of those differences was determined for different selection strengths by using the dominance patterns calculated previously for the Inarijoki and Tenjoki populations. Considering a gene with 2 alleles *A* and *B* with respective frequencies *p* and *q*, the allele frequency after a selection event corresponds to:

$$p_s = \frac{p^2 W_{AA} + pq W_{AB}}{p^2 W_{AA} + 2pq W_{AB} + q^2 W_{BB}}$$

with  $W_{AA}$ ,  $W_{AB}$  and  $W_{BB}$  the relative fitness of each respective genotype:

$$W_{AA} = 1; W_{AB} = 1 - DS \text{ and } W_{BB} = 1 - S.$$

where *S* is the selection coefficient common to each sex, varying from 0 to 0.90 by 0.15 intervals. *D* is the dominance coefficient.  $P_s$  was calculated for each sex and population using the corresponding dominance coefficients previously calculated from phenotypes ( $\delta$ ) and an initial *p* varying from 0 to 1. The expected difference in allele frequency in Supplementary Figure 7 corresponds to  $p_s(\text{female}) - p_s(\text{male})$ , calculated for each combination of *S* and *p*.

## Estimation of selection coefficients

A Bayesian model was developed to estimate selection coefficients by accounting for drift induced by a limited number of spawners, in a similar way to Wright-Fisher models.

First, the linkage disequilibrium method<sup>47</sup> implemented in the software NeEstimator 2.01<sup>48</sup> was applied on samples grouped by cohort year to estimate the parental effective number of breeders (*N<sub>b</sub>*). This approach was favored over the standard temporal method potentially generating biased effective size estimates when used with temporally close samples from species with overlapping generations<sup>49</sup> and only providing information about the harmonic mean of effective sizes. In order to use the linkage disequilibrium *N<sub>b</sub>* values and associated 95% parametric confidence intervals in the Bayesian models, parameters of log-normal distributions with similar percentiles were assessed using the R package *rriskDistributions*<sup>50</sup>. Weights of 7, 2 and 1 were respectively assigned to the 2.5, 5.0 and 97.5 percentiles to increase the approximation precision for lower bounds and medians. The negative or infinite values were replaced by 5000 or 10 000 for the median and 95% confidence interval upper bound, respectively. These are realistic maximum breeder numbers in the populations and

represent a conservative approach. If the lower bound also displayed infinite values, the corresponding distribution had a median of 9 000 and lower and upper bounds of respectively 8 000 and 10 000.

The selection coefficient represents “the reduction in relative fitness, and therefore genetic contribution to future generations, of one genotype compared to another”<sup>51</sup>. Selection coefficients were estimated using 32 and 33 different spawning years, with corresponding birth years, for Tenojoki and Inarijoki, respectively. Considering a SNP with alleles A1 and A2 and  $W_y^{11} = 1$ ,  $W_y^{12} = 1 - DS$  and  $W_y^{22} = 1 - S$  being the relative fitness of each genotype.  $S$  corresponds to the selection coefficient, following a uniform prior distribution ranging from -1 to 1.  $D$  denotes the dominance coefficient, following a uniform prior distribution ranging from 0 to 1. The observed number of each genotype  $g$  in spawners of sex  $s$  in year  $y$  ( $O_{g,s,y}$ ) followed a Dirichlet Multinomial (DM) distribution:

$$O_{g,s,y} \sim DM(T_{s,y}, g_{s,y}^{11} \dots g_{s,y}^{22}, \eta)$$

where  $\eta$  is the variation parameter following a uniform distribution ranging from 1 to 2500 and  $T_{s,y}$  the total number of spawners per sex and year. The spawners genotype frequency for each sex ( $g_{s,y}^{11} \dots g_{s,y}^{22}$ ) varied over years according to a hierarchical model,  $g_{s,y}^{11} \dots g_{s,y}^{22} \sim \text{dirichlet}(\mu g_s^{11} \dots \mu g_s^{22}, \eta)$  and  $\mu g_s^{11} \dots \mu g_s^{22} \sim \text{dirichlet}(1, 1, 1)$ . The observed number of allele A1 ( $n_y$ ) in individuals born in year  $y$  follow a binomial distribution:

$$n_y \sim \text{Binomial}(p_y, 2 N_y)$$

with  $N_y$  being the total number of individuals per year and  $p_y$  the population allele frequency. The expected allele frequency in the cohort  $y$  depends on genotype frequency in spawners the year before as follow:

$$E[p_y] = \frac{g_{y-1}^{11} W^{11} + 0.5 g_{y-1}^{12} W^{12}}{\bar{W}}$$

with  $\bar{W}$  being the population mean fitness  $\bar{W} = g_{y-1}^{11} W^{11} + g_{y-1}^{12} W^{12} + g_{y-1}^{22} W^{22}$ .  $g_{y-1}^{11}$ ,  $g_{y-1}^{12}$  and  $g_{y-1}^{22}$  are the genotypes of spawners averaged across sexes, as each sex contributes equally to the next generation despite a potential biased sex-ratio. Genetic drift should be taken into account to estimate  $p_y$  from the genotype frequencies of the previous year's spawners. In populations with random mating, it corresponds to drawing randomly  $p_y$  from a binomial distribution (Fisher 1930; Wright 1931) with as parameters the expected allele frequency  $E[p_y]$  and twice the effective number of spawners, previously estimated with the linkage disequilibrium method ( $2 N b_y$ ). Consequently, the expected variance of the allele frequency  $p_y$  subject to drift is after one generation  $\text{Var}(p_y) = \frac{p_y(1-p_y)}{2 N b_y}$ . For computing time and convergence reasons, a beta distribution with equal mean and variance was used instead:

$$p_y \sim \text{Beta}(\alpha, \beta)$$

with

$$\alpha = \frac{E[p_y](\text{Var}(p_y) + E[p_y]^2 - E[p_y])}{\text{Var}(p_y)} \quad \text{and} \quad \beta = \frac{(\text{Var}(p_y) + E[p_y]^2 - E[p_y])(E[p_y] - 1)}{\text{Var}(p_y)}$$



Priors used in this model were chosen to be as uninformative as possible. For the *vgll3* locus, the *L* allele was chosen as reference. The “pMCMC” were calculated from the two chains as following:  $2 * \min(p < 0; 1 - p < 0)$ ,  $p < 0$  being the proportion of values below zero.

Posterior distributions were approximated using Monte Carlo Markov Chain (MCMC) methods with the Just Another Gibbs Sampler software (JAGS, Plummer 2017) run in the R environment<sup>43</sup>. Two MCMC chains were run for 4.5 million iterations, including a burnin length of 3.5 million. Only one iteration out of 100 was kept to reduce the memory size used. Gelman and Rubin’s convergence diagnostic<sup>53</sup> was used to assess convergence. Models were run longer if the potential scale reduction factor (*psrf*) was initially superior to 1.10. Finally, all models had potential scale reduction factor inferior or equal to 1.10 for all parameters, except for up to 2 *Nb<sub>y</sub>* parameters in 10 models for Inarijoki, having larger *psrf* (inferior to 1.30).

#### **Data and code availability:**

The datasets used during the current study will be uploaded to a public data repository upon acceptance.

#### **Code availability:**

The custom codes used during the current study are available from the corresponding author on reasonable request.

## **References**

1. Losos, J. B. Ecological character displacement and the study of adaptation. *Proc. Natl. Acad. Sci. U. S. A.* **97**, 5693–5695 (2000).
2. Andrew, R. L. *et al.* A road map for molecular ecology. *Mol. Ecol.* **22**, 2605–2626 (2013).
3. Sharpe, D. M. T. & Hendry, A. P. Life history change in commercially exploited fish stocks: An analysis of trends across studies. *Evol. Appl.* **2**, 260–275 (2009).
4. Teplitsky, C. & Millien, V. Climate warming and Bergmann’s rule through time: Is there any evidence? *Evol. Appl.* **7**, 156–168 (2014).
5. Gienapp, P., Teplitsky, C., Alho, J. S., Mills, J. A. & Merilä, J. Climate change and evolution: Disentangling environmental and genetic responses. *Mol. Ecol.* **17**, 167–178 (2008).
6. Merilä, J. & Hendry, A. P. Climate change, adaptation, and phenotypic plasticity: The problem and the evidence. *Evol. Appl.* **7**, 1–14 (2014).
7. Merilä, J. & Hoffmann, A. A. Evolutionary Impacts of Climate Change. *Oxford Res. Encycl. Environ. Sci.* **1**, 1–17 (2016).



- 461 8. Savolainen, O., Lascoux, M. & Merilä, J. Ecological genomics of local adaptation.  
462 *Nat. Publ. Gr.* **14**, 807–820 (2013).
- 463 9. Crnokrak, P. & Roff, D. A. Dominance variance: Associations with selection and  
464 fitness. *Heredity (Edinb)*. **75**, 530–540 (1995).
- 465 10. Barson, N. J. *et al.* Sex-dependent dominance at a single locus maintains variation in  
466 age at maturity in salmon. *Nature* **528**, 405–408 (2015).
- 467 11. Liang, Y. *et al.* A gene network regulated by the transcription factor VGLL3 as a  
468 promoter of sex-biased autoimmune diseases. *Nat. Immunol.* **18**, 152–160 (2017).
- 469 12. Fleming, I. a. Reproductive strategies of Atlantic salmon: ecology and evolution. *Fish.*  
470 *Rev. Fish Biol. Fish.* **6**, 349–416 (1996).
- 471 13. Mank, J. E. Population genetics of sexual conflict in the genomic era. *Nat. Rev. Genet.*  
472 **18**, 721–730 (2017).
- 473 14. Chaput, G. Overview of the status of Atlantic salmon (*Salmo salar*) in the North  
474 Atlantic and trends in marine mortality. *ICES J. Mar. Sci.* **69**, 1538–1548 (2012).
- 475 15. Erkinaro, J., Czorlich, Y., Orell, P., Kuusela, J. & Primmer, C. R. Life history variation  
476 across four decades in a diverse population complex of Atlantic salmon in a large  
477 subarctic river. *Can. J. Fish. Aquat. Sci.* In press (2018). doi:10.1139/cjfas-2017-0343
- 478 16. Otero, J. *et al.* Contemporary ocean warming and freshwater conditions are related to  
479 later sea age at maturity in Atlantic salmon spawning in Norwegian rivers. *Ecol. Evol.*  
480 **2**, 2192–2203 (2012).
- 481 17. Crozier, L. G. & Hutchings, J. A. Plastic and evolutionary responses to climate change  
482 in fish. *Evol. Appl.* **7**, 68–87 (2014).
- 483 18. Vähä, J.-P., Erkinaro, J., Niemelä, E. & Primmer, C. R. Temporally stable genetic  
484 structure and low migration in an Atlantic salmon population complex: implications  
485 for conservation and management. *Evol. Appl.* **1**, 137–154 (2008).
- 486 19. Heinimaa, S. & Heinimaa, P. Effect of the female size on egg quality and fecundity of  
487 the wild Atlantic salmon in the sub-arctic River Teno. *Boreal Environ. Res.* **9**, 55–62  
488 (2004).
- 489 20. Jonsson, B., Jonsson, N. & Albretsen, J. Environmental change influences the life  
490 history of salmon *Salmo salar* in the North Atlantic Ocean. *J. Fish Biol.* **88**, 618–637  
491 (2016).
- 492 21. Ohlberger, J., Ward, E. J., Schindler, D. E. & Lewis, B. Demographic changes in  
493 Chinook salmon across the Northeast Pacific Ocean. *Fish Fish.* **00**, 1–14 (2018).
- 494 22. Friedland, K. D. *et al.* The recruitment of Atlantic salmon in Europe. *ICES J. Mar. Sci.*  
495 **66**, 289–304 (2009).
- 496 23. Frainer, A. *et al.* Climate-driven changes in functional biogeography of Arctic marine  
497 fish communities. *Proc. Natl. Acad. Sci.* **114**, 12202–12207 (2017).
- 498 24. Kortsch, S. *et al.* Climate change alters the structure of arctic marine food webs due to

- 499 poleward shifts of boreal generalists. *Proc. R. Soc. B* **282**, 20151546 (2015).
- 500 25. Jensen, A. J. Cessation of the Norwegian drift net fishery: changes observed in  
501 Norwegian and Russian populations of Atlantic salmon. *ICES J. Mar. Sci.* **56**, 84–95  
502 (1999).
- 503 26. Kuparinen, A. & Hutchings, J. A. Genetic architecture of age at maturity can generate  
504 either directional or divergent and disruptive harvest-induced evolution. *Philos. Trans.*  
505 *R. Soc. B Biol. Sci.* **372**, 20160035 (2016).
- 506 27. Hjermann, D. Ø., Ottersen, G. & Stenseth, N. C. Competition among fishermen and  
507 fish causes the collapse of Barents Sea capelin. *Proc. Natl. Acad. Sci. U. S. A.* **101**,  
508 11679–11684 (2004).
- 509 28. Ghalambor, C. K., McKay, J. K., Carroll, S. P. & Reznick, D. N. Adaptive versus non-  
510 adaptive phenotypic plasticity and the potential for contemporary adaptation in new  
511 environments. *Funct. Ecol.* **21**, 394–407 (2007).
- 512 29. Schindler, D. E. *et al.* Population diversity and the portfolio effect in an exploited  
513 species. *Nature* **465**, 609–12 (2010).
- 514 30. Vähä, J.-P., Erkinaro, J., Niemelä, E. & Primmer, C. R. Life-history and habitat  
515 features influence the within-river genetic structure of Atlantic salmon. *Mol. Ecol.* **16**,  
516 2638–54 (2007).
- 517 31. Vähä, J., Erkinaro, J., Falkegård, M., Orell, P. & Niemelä, E. Genetic stock  
518 identification of Atlantic salmon and its evaluation in a large population complex. *Can.*  
519 *J. Fish. Aquat. Sci.* **12**, 1–12 (2016).
- 520 32. ICES. Report of the Baltic salmon and trout assessment working group (WGBAST).  
521 3–12 (2013).
- 522 33. ICES. Report of the Workshop on Age Determination of Salmon (WKADS). ICES  
523 Document CM 2011/ACOM:44 66pp. 18–20 (2011).
- 524 34. Niemelä, E. *et al.* Temporal variation in abundance, return rate and life histories of  
525 previously spawned Atlantic salmon in a large subarctic river. *J. Fish Biol.* **68**, 1222–  
526 1240 (2006).
- 527 35. Pritchard, V. L. *et al.* Genomic signatures of fine-scale local selection in atlantic  
528 salmon suggest involvement of sexual maturation, energy homeostasis, and immune  
529 defence-related genes. *Mol. Ecol.* In press (2018). doi:10.1111/mec.14705
- 530 36. Niemelä, E. *et al.* Previously spawned Atlantic salmon ascend a large subarctic river  
531 earlier than their maiden counterparts. *J. Fish Biol.* **69**, 1151–1163 (2006).
- 532 37. Aykanat, T., Pritchard, V. L., Lindqvist, M. & Primmer, C. R. From population  
533 genomics to conservation and management: a workflow for targeted analysis of  
534 markers identified using genome-wide approaches in Atlantic salmon. *J. Fish Biol.* **89**,  
535 2658–2679 (2016).
- 536 38. Falush, D., Stephens, M. & Pritchard, J. K. Inference of population structure using  
537 multilocus genotype data: Linked loci and correlated allele frequencies. *Genetics* **164**,  
538 1567–1587 (2003).

39. Evanno, G., Regnaut, S. & Goudet, J. Detecting the number of clusters of individuals using the software STRUCTURE: A simulation study. *Mol. Ecol.* **14**, 2611–2620 (2005).
40. Earl, D. A. & vonHoldt, B. M. STRUCTURE HARVESTER: A website and program for visualizing STRUCTURE output and implementing the Evanno method. *Conserv. Genet. Resour.* **4**, 359–361 (2012).
41. Goudet, J., Raymond, M., De Meeüs, T. & Rousset, F. Testing differentiation in diploid populations. *Genetics* **144**, 1933–1940 (1996).
42. Wood, S. N. Fast stable restricted maximum likelihood and marginal likelihood estimation of semiparametric generalized linear models. *J. R. Stat. Soc. Ser. B Stat. Methodol.* **73**, 3–36 (2011).
43. R Core Team. R: The R Project for Statistical Computing. (2017).
44. Venables, W. N. & Ripley, B. D. *Modern Applied Statistics With S*. (Springer, 2002).
45. Fox, J. Effect Displays in R for Generalised Linear Models. *J. Stat. Softw.* **8**, 1–27 (2003).
46. Lenth, R. V. Least-Squares Means: The R Package **lsmeans**. *J. Stat. Softw.* **69**, (2016).
47. Waples, R. S. A bias correction for estimates of effective population size based on linkage disequilibrium at unlinked gene loci. *Conserv. Genet.* **7**, 167–184 (2006).
48. Do, C. *et al.* NeEstimator v2: Re-implementation of software for the estimation of contemporary effective population size ( $N_e$ ) from genetic data. *Mol. Ecol. Resour.* **14**, 209–214 (2014).
49. Waples, R. S. & Yokota, M. Temporal estimates of effective population size in species with overlapping generations. *Genetics* **175**, 219–233 (2007).
50. Belgorodski, N., Greiner, M., Tolksdorf, K. & Schueller, K. riskDistributions: Fitting Distributions to Given Data or Known Quantiles. R package version 2.0. *R Found. Stat. Comput. Vienna*. (2017).
51. Allendorf, F. W. & Luikart, G. *Conservation and the genetics of populations*. (Blackwell Pub, 2007).
52. Plummer, M. JAGS Version 4.3.0 user manual. (2017).
53. Brooks, S. P. B. & Gelman, A. G. General methods for monitoring convergence of iterative simulations. *J. Comput. Graph. Stat.* **7**, 434–455 (1998).

## Acknowledgements

We thank fishers who participated to the collection of scales and phenotypic information and Jorma Kuusela for organizing and sending scales. Funding was provided by the Academy of Finland (projects No. 284941, 286334, 307593, 302873 and 318939)

## Author contributions

J.E and P.O. coordinate the collection of samples; C.R.P., Y.C., T.A. and J.E. designed the study; Y.C. analyzed the data; Y.C., C.P. and T.A. wrote the manuscript and all authors contributed to its revision.

## Competing interests

The authors declare no competing financial interests.

**Correspondence and requests for materials** should be addressed to C.R.P.
